# Supplementary material
Source: PubMed Central journal article supplement (PMC7617069)
Supplement: EMS85197-supplement-Supplementary_tables.pdf [file EMS85197-supplement-Supplementary_tables.pdf]

**Supplementary Table 1 - Reagents**

| <b>Reagents</b>                                                                             | <b>Supplier</b>                | <b>Ref</b>     |
|---------------------------------------------------------------------------------------------|--------------------------------|----------------|
| Fibronectin, Human                                                                          | R&D Systems                    | 1918-FN        |
| Fibonectin, Bovine                                                                          | Sigma-Aldrich                  | F1141          |
| Carbonyl cyanide 3-chlorophenylhydrazone (CCCP)                                             | Sigma-Aldrich                  | C2759          |
| Concanavalin A (ConA)                                                                       | Sigma-Aldrich                  | L7647          |
| Aphidicolin                                                                                 | Sigma-Aldrich                  | A4487          |
| Matrigel Basement Membrane Matrix                                                           | Corning                        | 354234         |
| Collagen I, Rat tail                                                                        | Corning                        | 354249         |
| Phosphocreatine disodium salt hydrate                                                       | Sigma-Aldrich                  | P7936          |
| 2-Imino-1-imidazolidineacetic acid (Cyclocreatine)                                          | Sigma-Aldrich                  | 377627         |
| 1-Carboxymethyl-2-iminoimidazolidine (Cyclocreatine)                                        | AstaTech                       | 57312          |
| U-13C6-D-Glucose, 99%                                                                       | Cambridge Isotope Laboratories | CLM-1396-PK    |
| Sigmacote                                                                                   | Sigma-Aldrich                  | SL2            |
| sulfosuccinimidyl 6-(4'-azido-2'-nitrophenylamino)hexanoate (sulfo-SANPAH)                  | Thermo Fisher Scientific       | 22589          |
| 3-(Acryloyloxy)propyltrimethoxysilane                                                       | Alfa Aesar                     | L16400         |
| Acrylamide 40% Solution                                                                     | Sigma-Aldrich                  | A4058          |
| N,N'-methylene-bis-acrylamide 2% solution                                                   | Sigma-Aldrich                  | M1533          |
| N,N,N',N'-Tetramethylethylenediamine (TEMED)                                                | Sigma-Aldrich                  | T9281          |
| Ammonium Persulfate                                                                         | Sigma-Aldrich                  | A3678          |
| N-Acetyl-L-cysteine                                                                         | Sigma-Aldrich                  | A7250          |
| Ammonium hydroxide                                                                          | Sigma-Aldrich                  | 221228         |
| Hydrogen peroxide (30%w/w)                                                                  | Sigma-Aldrich                  | 31642          |
| <i>tert</i> -Butyl hydroperoxide solution                                                   | Sigma-Aldrich                  | 416665         |
| L-Arginine:HCL (13C6, 99%; 15N4, 99%)                                                       | Cambridge Isotope Laboratories | CNML-539-H-0.1 |
| Saponin                                                                                     | Sigma-Aldrich                  | 47036          |
| Gelatin from cold water fish skin                                                           | Sigma-Aldrich                  | G7041          |
| Oligomycin A                                                                                | Sigma-Aldrich                  | 75351-5MG      |
| Jasplakinolide                                                                              | TOCRIS Bioscience              | 2792           |
| Lipofectamine RNAiMAX                                                                       | Thermo Fisher Scientific       | 13778150       |
| Lipofectamine 2000                                                                          | Thermo Fisher Scientific       | 11668019       |
| Lullaby                                                                                     | OZ Biosciences                 | FLL73000       |
| Amara Cell Line Nucleofector Kit V                                                          | Lonza                          | VCA-1003       |
| Dialysed FBS                                                                                | Gibco                          | 16400-044      |
| SILAC DMEM Flex Media, no glucose, no phenol red                                            | Thermo Fisher Scientific       | A2493901       |
| Fluospheres Carboxylate-modified microspheres, 0.2 µm, red fluorescent (580/605), 2% solids | Thermo Fisher Scientific       | F8810          |
| Blebbistatin                                                                                | Sigma-Aldrich                  | B0560          |
| Precision Red Advanced Protein Assay                                                        | Cytoskeleton                   | ADV02-A        |
| Puromycin dihydrochloride                                                                   | Thermo Fisher Scientific       | A1113803       |

**Supplementary Table 2 - DNA constructs**

| <b>Name</b>                      | <b>Backbone</b>        | <b>Source</b>        |
|----------------------------------|------------------------|----------------------|
| pSpCas9(BB)-2A-Puro (PX459) V2.0 |                        | Addgene #62988       |
| pEGFPC1 empty vector             | pEGFPC1                | Prof. L. M. Machesky |
| pEGFPC1/GgVcl1-258 (VD1)         | pEGFPC1                | Addgene #46270       |
| pEGFPC3-hYAP1                    | pEGFPC3                | Addgene #17843       |
| pCMV-flag YAP2 5SA               | pCMV                   | Addgene #27371       |
| pWZL Neo Myr Flag CKB            | pWZL-Neo-Myr-Flag-DEST | Addgene #20466       |
| pEGFP-C1 CKB                     | pEGFPC1                | This study           |
| pEGFP-C1 YAP5SA                  | pEGFPC1                | This study           |
| LifeAct-mTagRFP                  | LifeAct -mTagRFP-T     | Addgene #54586       |
| PA-GFP Actin                     | mPA-GFP-C1             | Addgene - #57121     |

**Supplementary Table 3 - Oligos**

| <b>Target Name</b>        | <b>Species</b>      | <b>Target sequence (5'→3')</b> | <b>Supplier</b>          | <b>Cat. No.</b> | <b>Application</b> |
|---------------------------|---------------------|--------------------------------|--------------------------|-----------------|--------------------|
| AllStars Negative Control |                     |                                | Qiagen                   | SI03650318      | siRNA              |
| CKB siRNA #01             | <i>Mus musculus</i> | CTGCCGCTTCCTAACTTATTA          | Qiagen                   | SI00951867      | siRNA              |
| CKB siRNA #02             | <i>Mus musculus</i> | AAGCTGTTGCTGACTGAAA            | Qiagen                   | SI00951888      | siRNA              |
| YAP siRNA #01             | <i>Mus musculus</i> | CTGGTCAAAGATACTTCTTAA          | Qiagen                   | SI00185584      | siRNA              |
| YAP siRNA #02             | <i>Mus musculus</i> | ATGGAGAAGTTTACTACATAA          | Qiagen                   | SI02669191      | siRNA              |
| CKB CRISPR #01            | <i>Mus musculus</i> | AAAGCCGCTCGGCGTGCACT           | Thermo Fisher Scientific |                 | CRISPR             |
| CKB CRISPR #02            | <i>Mus musculus</i> | ACGAGCATCCGGCCAGTCCC           | Thermo Fisher Scientific |                 | CRISPR             |

**Supplementary Table 4 - Hydrogels Composition**

| <b>Stiffness</b> | <b>Acrylamide (%)</b> | <b>BisAcrylamide (%)</b> |
|------------------|-----------------------|--------------------------|
| 0.7 kPa          | 3                     | 0.06                     |
| 7 kPa            | 5                     | 0.3                      |
| 38 kPa           | 10                    | 0.3                      |

Supplementary Table 5 - Antibodies/Dyes

| Antibody/Dye                                    | Species | Clone               | Supplier                 | Ref       | LOT         | Dilution                     | Application                       |
|-------------------------------------------------|---------|---------------------|--------------------------|-----------|-------------|------------------------------|-----------------------------------|
| YAP                                             | Rabbit  | Monoclonal, D8H1X   | CST                      | 14074     | 4           | 1:1000 / 1:100               | Western Blot / Immunofluorescence |
| $\alpha$ -Tubulin                               | Mouse   | Monoclonal, DM1A    | Sigma                    | T6199     | 029M4842V   | 1:3000                       | Western Blot                      |
| CKB                                             | Rabbit  | Polyclonal          | Abcam                    | ab151579  | GR143284-16 | 1:1000                       | Western Blot                      |
| GFP                                             | Mouse   | Monoclonal, 4B10    | CST                      | 2955      | 2           | 1:1000                       | Western Blot                      |
| ERK1/2                                          | Mouse   | Polyclonal          | CST                      | 9102      | 26          | 1:1000                       | Western Blot                      |
| AMPK- $\alpha$                                  | Rabbit  | Polyclonal          | CST                      | 25325     | 19          | 1:1000                       | Western Blot                      |
| phospho-AMPK $\alpha$ 1/ $\alpha$ 2 (T183/T172) | Rabbit  | Polyclonal          | Abcam                    | ab23875   | GR3244770-4 | 1:1000 / 1:100               | Western Blot / Immunofluorescence |
| GAPDH                                           | Mouse   | Monoclonal, 6C5     | Millipore                | MAB374    | 3249425     | 1:1000                       | Western Blot                      |
| Anti-Rabbit 800nm                               | Goat    | Polyclonal          | Thermo Fisher Scientific | SA5-35571 | TL277458    | 1:10000                      | Western Blot                      |
| Anti-Mouse 800nm                                | Goat    | Polyclonal          | Thermo Fisher Scientific | SA5-3552  | TC263804    | 1:10000                      | Western Blot                      |
| Anti-Rabbit 680nm                               | Donkey  | Polyclonal          | Invitrogen               | A21076    | 1874787     | 1:10000                      | Western Blot                      |
| Anti-Mouse 680nm                                | Donkey  | Polyclonal          | Invitrogen               | A10038    | 2017408     | 1:10000                      | Western Blot                      |
| phosphoPaxillin (Tyr118)                        | Rabbit  | Polyclonal          | CST                      | 2541      | 6           | 1:400                        | Immunofluorescence                |
| Vinculin                                        | Mouse   | Monoclonal, hVIN-1  | Sigma                    | V9131     | 036M4797V   | 1:400                        | Immunofluorescence                |
| Cortactin                                       | Mouse   | Monoclonal, 4F11    | Millipore                | 05-180    | 3153615     | 1:200                        | Immunofluorescence                |
| GFP                                             | Chicken | Polyclonal          | Abcam                    | ab13970   | GR236651-22 | 1:1000                       | Immunofluorescence                |
| Anti-Rabbit 488nm                               | Donkey  | Polyclonal          | Invitrogen               | A21206    | 2045215     | 1:500                        | Immunofluorescence                |
| Anti-Mouse 594nm                                | Donkey  | Polyclonal          | Invitrogen               | A21203    | 1918277     | 1:500                        | Immunofluorescence                |
| Anti-Chicken 488nm                              | Goat    | Polyclonal          | Invitrogen               | A11039    | 1812246     | 1:500                        | Immunofluorescence                |
| Phalloidin 647nm                                | n/a     | n/a                 | Invitrogen               | A22287    | 1941485     | 1:100                        | Immunofluorescence                |
| DAPI                                            | n/a     | n/a                 | Invitrogen               | D1306     | 1942280     | 0.5 $\mu$ g mL <sup>-1</sup> | Immunofluorescence                |
| CKB                                             | Rabbit  | Monoclonal, EPR3926 | Abcam                    | ab108388  | GR42673-13  | 1:200                        | IHC                               |
| YAP                                             | Rabbit  | Polyclonal          | CST                      | 4912      | 7           | 1:50                         | IHC                               |
| Fibronectin                                     | Rabbit  | Polyclonal          | Dako                     | A0245     | 00062151    | 1:600                        | IHC                               |
| MitoTracker Green                               | n/a     | n/a                 | Thermo Fisher Scientific | M7514     | 1861616     | 200nM                        | Live Imaging / FACS               |
| TMRE                                            | n/a     | n/a                 | Abcam                    | ab113852  |             | 100nM                        | FACS                              |
| NucBlue Live reagent                            | n/a     | n/a                 | Thermo Fisher Scientific | R37605    | 1825105     |                              | Live Imaging                      |
| Cell Tracker Red (CMTPX)                        | n/a     | n/a                 | Thermo Fisher Scientific | C34552    | 1861191     | 1 $\mu$ M                    | Live Imaging                      |
| CellROX Deep Red                                | n/a     | n/a                 | Thermo Fisher Scientific | C10422    | 1990333     | 1 $\mu$ M                    | FACS                              |

**Supplementary Table 6 - qRT-PCR primers**

| <b>Target Name</b> | <b>Species</b>      | <b>Sequence (5'→3')</b>     | <b>Supplier</b>          |
|--------------------|---------------------|-----------------------------|--------------------------|
| <i>Ckb</i>         | <i>Mus musculus</i> | Fw - CGGCCTCACTCAGATCGAAA   | Thermo Fisher Scientific |
| <i>Ckb</i>         | <i>Mus musculus</i> | Rv - TGAGGATGTAGCCCAGGTGA   | Thermo Fisher Scientific |
| <i>Ckm</i>         | <i>Mus musculus</i> | Fw - AACCTCAAGGGTGGAGACGA   | Thermo Fisher Scientific |
| <i>Ckm</i>         | <i>Mus musculus</i> | Rv - TGC GGAGGCAGAGTGTAAC   | Thermo Fisher Scientific |
| <i>Ckmt1</i>       | <i>Mus musculus</i> | Fw - CGAGGGATCTGGCACAACAA   | Thermo Fisher Scientific |
| <i>Ckmt1</i>       | <i>Mus musculus</i> | Rv - TCTCTTCATGTTGCCGCCTT   | Thermo Fisher Scientific |
| <i>CKmt2</i>       | <i>Mus musculus</i> | Fw - GTCGTGGACTAAAGGAAGTGGA | Thermo Fisher Scientific |
| <i>CKmt2</i>       | <i>Mus musculus</i> | Rv - CGCAATCCAGTTCCGAGGTT   | Thermo Fisher Scientific |
| <i>Cdk2</i>        | <i>Mus musculus</i> | Fw - TGAAATGCACCTAGTGTGTACC | Thermo Fisher Scientific |
| <i>Cdk2</i>        | <i>Mus musculus</i> | Rv - TCCTTGTGATGCAGCCACTT   | Thermo Fisher Scientific |
| <i>Gapdh</i>       | <i>Mus musculus</i> | Fw - CATGGCCTACATGGCCTCCA   | Thermo Fisher Scientific |
| <i>Gapdh</i>       | <i>Mus musculus</i> | Rv - TGGGATAGGGCCTCTCTTGC   | Thermo Fisher Scientific |
| <i>Yap</i>         | <i>Mus musculus</i> | Fw - TTTCCGGCAGGCAATACGGAA  | Thermo Fisher Scientific |
| <i>Yap</i>         | <i>Mus musculus</i> | Rv - GCATTCCGAGTCCCTCCATC   | Thermo Fisher Scientific |

Supplementary Table 7 - Mice

| Mouse ID                                  | Strain                                       | Genotype                                          | Sex    | Genetic Background | Age (days) | Application  | Source                     |
|-------------------------------------------|----------------------------------------------|---------------------------------------------------|--------|--------------------|------------|--------------|----------------------------|
| <b>KPC endpoint PDAC</b>                  |                                              |                                                   |        |                    |            |              |                            |
| FPZPR 103996                              | Pdx-1::Cre;LSL-Kras G12D;LSL-p53 R172H (KPC) | Pdx-1::Cre+;LSL-Kras G12D/+;LSL-p53 R172H/+ (KPC) | Male   | C57BL/6j           | 118        | IHC          | CRUK Beatson Institute     |
| BALF 162992                               | Pdx-1::Cre;LSL-Kras G12D;LSL-p53 R172H (KPC) | Pdx-1::Cre+;LSL-Kras G12D/+;LSL-p53 R172H/+ (KPC) | Male   | C57BL/6j           | 123        | IHC          | CRUK Beatson Institute     |
| BALF 192959                               | Pdx-1::Cre;LSL-Kras G12D;LSL-p53 R172H (KPC) | Pdx-1::Cre+;LSL-Kras G12D/+;LSL-p53 R172H/+ (KPC) | Male   | C57BL/6j           | 233        | IHC          | CRUK Beatson Institute     |
| BALF 192970                               | Pdx-1::Cre;LSL-Kras G12D;LSL-p53 R172H (KPC) | Pdx-1::Cre+;LSL-Kras G12D/+;LSL-p53 R172H/+ (KPC) | Female | C57BL/6j           | 114        | IHC          | CRUK Beatson Institute     |
| BALA 27356                                | Pdx-1::Cre;LSL-Kras G12D;LSL-p53 R172H (KPC) | Pdx-1::Cre+;LSL-Kras G12D/+;LSL-p53 R172H/+ (KPC) | Male   | C57BL/6j           | 140        | IHC          | CRUK Beatson Institute     |
| BALA 32316                                | Pdx-1::Cre;LSL-Kras G12D;LSL-p53 R172H (KPC) | Pdx-1::Cre+;LSL-Kras G12D/+;LSL-p53 R172H/+ (KPC) | Female | C57BL/6j           | 152        | IHC          | CRUK Beatson Institute     |
| BALA 32329                                | Pdx-1::Cre;LSL-Kras G12D;LSL-p53 R172H (KPC) | Pdx-1::Cre+;LSL-Kras G12D/+;LSL-p53 R172H/+ (KPC) | Female | C57BL/6j           | 94         | IHC          | CRUK Beatson Institute     |
| BALF 6.1b                                 | Pdx-1::Cre;LSL-Kras G12D;LSL-p53 R172H (KPC) | Pdx-1::Cre+;LSL-Kras G12D/+;LSL-p53 R172H/+ (KPC) | Male   | C57BL/6j           | 170        | IHC          | CRUK Beatson Institute     |
| BALF 6.1e                                 | Pdx-1::Cre;LSL-Kras G12D;LSL-p53 R172H (KPC) | Pdx-1::Cre+;LSL-Kras G12D/+;LSL-p53 R172H/+ (KPC) | Female | C57BL/6j           | 166        | IHC          | CRUK Beatson Institute     |
| BALA 22160                                | Pdx-1::Cre;LSL-Kras G12D;LSL-p53 R172H (KPC) | Pdx-1::Cre+;LSL-Kras G12D/+;LSL-p53 R172H/+ (KPC) | Female | C57BL/6j           | 99         | IHC          | CRUK Beatson Institute     |
| BALA 24900                                | Pdx-1::Cre;LSL-Kras G12D;LSL-p53 R172H (KPC) | Pdx-1::Cre+;LSL-Kras G12D/+;LSL-p53 R172H/+ (KPC) | Female | C57BL/6j           | 94         | IHC          | CRUK Beatson Institute     |
| BALA 32310                                | Pdx-1::Cre;LSL-Kras G12D;LSL-p53 R172H (KPC) | Pdx-1::Cre+;LSL-Kras G12D/+;LSL-p53 R172H/+ (KPC) | Male   | C57BL/6j           | 139        | IHC          | CRUK Beatson Institute     |
| BALA 47000                                | Pdx-1::Cre;LSL-Kras G12D;LSL-p53 R172H (KPC) | Pdx-1::Cre+;LSL-Kras G12D/+;LSL-p53 R172H/+ (KPC) | Male   | C57BL/6j           | 101        | IHC          | CRUK Beatson Institute     |
| <b>Normal Pancreas</b>                    |                                              |                                                   |        |                    |            |              |                            |
| BALF 170396                               | Pdx-1::Cre;LSL-Kras G12D;LSL-p53 R172H (KPC) | Pdx-1::Cre+;LSL-Kras +/-;LSL-p53 +/-              | Male   | C57BL/6j           | 204        | IHC          | CRUK Beatson Institute     |
| BALF 171667                               | Pdx-1::Cre;LSL-Kras G12D;LSL-p53 R172H (KPC) | Pdx-1::Cre+;LSL-Kras +/-;LSL-p53 +/-              | Female | C57BL/6j           | 202        | IHC          | CRUK Beatson Institute     |
| BALF 80410                                | Pdx-1::Cre;LSL-Kras G12D;LSL-p53 R172H (KPC) | Pdx-1::Cre+;LSL-Kras +/-;LSL-p53 +/-              | Male   | C57BL/6j           | 46         | IHC          | CRUK Beatson Institute     |
| BALF 80418                                | Pdx-1::Cre;LSL-Kras G12D;LSL-p53 R172H (KPC) | Pdx-1::Cre+;LSL-Kras +/-;LSL-p53 +/-              | Female | C57BL/6j           | 46         | IHC          | CRUK Beatson Institute     |
| BALF 80415                                | Pdx-1::Cre;LSL-Kras G12D;LSL-p53 R172H (KPC) | Pdx-1::Cre+;LSL-Kras +/-;LSL-p53 +/-              | Male   | C57BL/6j           | 46         | IHC          | CRUK Beatson Institute     |
| <b>KPC 10-week PanIN</b>                  |                                              |                                                   |        |                    |            |              |                            |
| BAID 67.3c                                | Pdx-1::Cre;LSL-Kras G12D;LSL-p53 R172H (KPC) | Pdx-1::Cre+;LSL-Kras G12D/+;LSL-p53 R172H/+ (KPC) | Male   | C57BL/6j           | 68         | IHC          | CRUK Beatson Institute     |
| BAID 91.1a                                | Pdx-1::Cre;LSL-Kras G12D;LSL-p53 R172H (KPC) | Pdx-1::Cre+;LSL-Kras G12D/+;LSL-p53 R172H/+ (KPC) | Female | C57BL/6j           | 69         | IHC          | CRUK Beatson Institute     |
| BAID 91.1d                                | Pdx-1::Cre;LSL-Kras G12D;LSL-p53 R172H (KPC) | Pdx-1::Cre+;LSL-Kras G12D/+;LSL-p53 R172H/+ (KPC) | Female | C57BL/6j           | 69         | IHC          | CRUK Beatson Institute     |
| BAID 91.1f                                | Pdx-1::Cre;LSL-Kras G12D;LSL-p53 R172H (KPC) | Pdx-1::Cre+;LSL-Kras G12D/+;LSL-p53 R172H/+ (KPC) | Female | C57BL/6j           | 69         | IHC          | CRUK Beatson Institute     |
| BAID 91.2b                                | Pdx-1::Cre;LSL-Kras G12D;LSL-p53 R172H (KPC) | Pdx-1::Cre+;LSL-Kras G12D/+;LSL-p53 R172H/+ (KPC) | Female | C57BL/6j           | 69         | IHC          | CRUK Beatson Institute     |
| <b>KPC 15-week PanIN</b>                  |                                              |                                                   |        |                    |            |              |                            |
| BALF 11.2g                                | Pdx-1::Cre;LSL-Kras G12D;LSL-p53 R172H (KPC) | Pdx-1::Cre+;LSL-Kras G12D/+;LSL-p53 R172H/+ (KPC) | Female | C57BL/6j           | 104        | IHC          | CRUK Beatson Institute     |
| BALF 18.2b                                | Pdx-1::Cre;LSL-Kras G12D;LSL-p53 R172H (KPC) | Pdx-1::Cre+;LSL-Kras G12D/+;LSL-p53 R172H/+ (KPC) | Female | C57BL/6j           | 103        | IHC          | CRUK Beatson Institute     |
| BALF 18.2d                                | Pdx-1::Cre;LSL-Kras G12D;LSL-p53 R172H (KPC) | Pdx-1::Cre+;LSL-Kras G12D/+;LSL-p53 R172H/+ (KPC) | Female | C57BL/6j           | 103        | IHC          | CRUK Beatson Institute     |
| BALF 18.2e                                | Pdx-1::Cre;LSL-Kras G12D;LSL-p53 R172H (KPC) | Pdx-1::Cre+;LSL-Kras G12D/+;LSL-p53 R172H/+ (KPC) | Female | C57BL/6j           | 103        | IHC          | CRUK Beatson Institute     |
| BALF 11.2a                                | Pdx-1::Cre;LSL-Kras G12D;LSL-p53 R172H (KPC) | Pdx-1::Cre+;LSL-Kras G12D/+;LSL-p53 R172H/+ (KPC) | Male   | C57BL/6j           | 104        | IHC          | CRUK Beatson Institute     |
| <b>Intrasplenic Transplantation Model</b> |                                              |                                                   |        |                    |            |              |                            |
| BVCD5.1a-x                                | Foxn1-nu;Hom (CD1-nu)                        | Foxn1-nu;Hom (CD1-nu)                             | Female | CD1                | 62         | Intrasplenic | Charles River Laboratories |
